# Supplementary material for: Development of a Sensitive Bioassay for the Analysis of IGF-Related Activation of AKT/mTOR Signaling in Biological Matrices
Source: MDPI journal article supplement (doi:10.3390/cells10030482), 2021-02-24
Supplement: s1 [file s1]

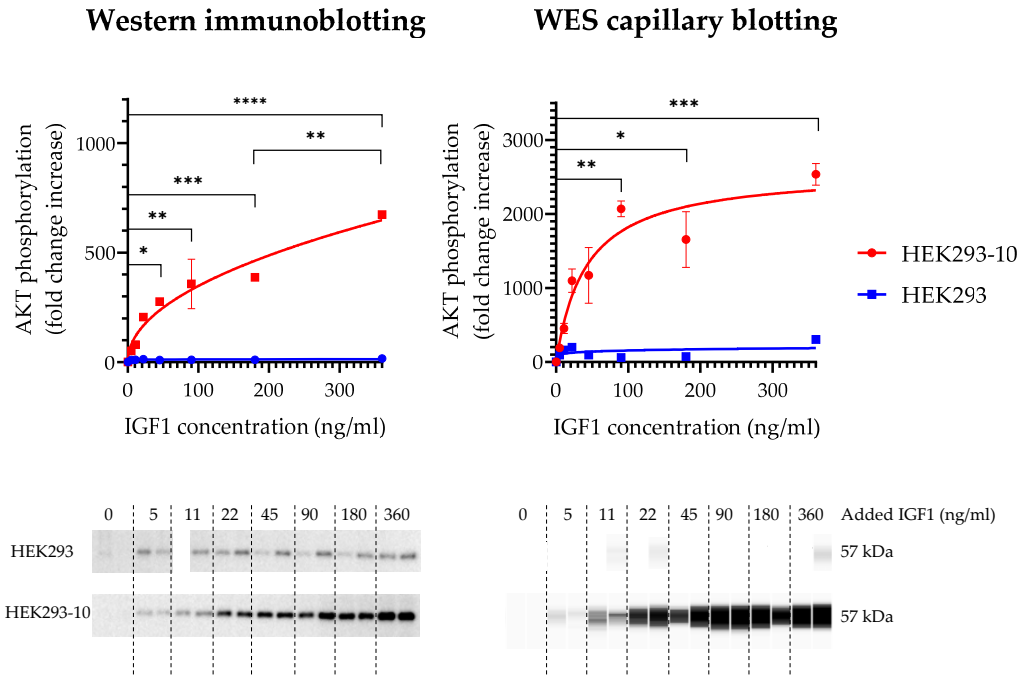

**Scheme 1.** Dose-dependent increase of AKT phosphorylation in IGFBP2-transfected HEK293-10 cells and untransfected HEK293 cells. Cells were incubated in different concentrations of human recombinant IGF1 as indicated for 20 min before they were lysed and assayed for phosphorylation of AKT by Western immunoblotting or capillary blotting (WES, Protein Simple) as described in Materials and Methods (mean  $\pm$  SEM; n = 23, \* p < 0.05, \*\* p < 0.01, \*\*\* p < 0.001, \*\*\*\* p < 0.0001).

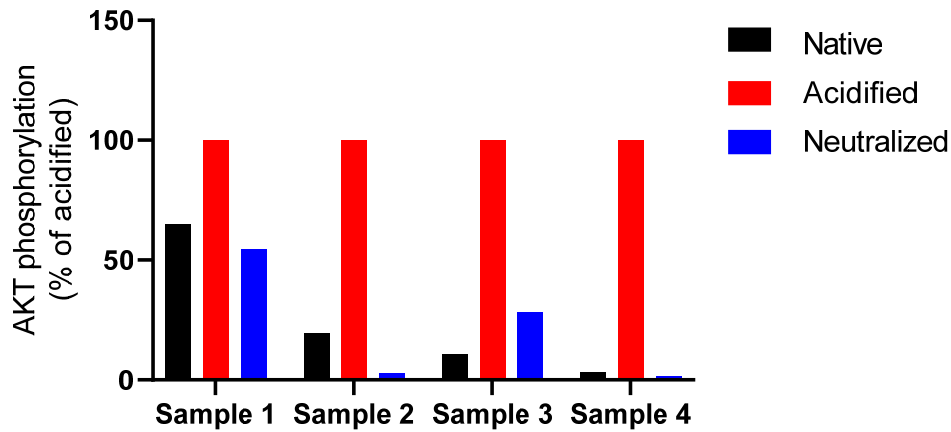

**Scheme 2.** Effects of native, acidified, and neutralized milk samples on AKT phosphorylation in HEK293-10 cells. Samples from four individual dairy cows were incubated with HEK293-10 cell monolayer for 30 min, and AKT phosphorylation was assessed by Western immunoblotting.

**Scheme 1.** Table of settings for WES analysis.

| <b>Menu</b> | <b>Setting</b>                | <b>Value</b> |
|-------------|-------------------------------|--------------|
| Peaks       | Molecular Weight              | 58 kDa       |
|             | Range                         | ± 15 %       |
| Range       | Minimum                       | 1.0          |
|             | Maximum                       | 250.0        |
| Baseline    | Threshold                     | 10.0         |
|             | Window                        | 25.0         |
|             | Stiffness                     | 1.0          |
| Peak Find   | Threshold                     | 20.0         |
|             | Width                         | 12.0         |
|             | Area Calculation              | Gaussian fit |
|             | Peak Width                    | 15           |
| Advanced    | Allowable Drift               | 100          |
|             | Peak Fit Starting Width Ratio | 0.5          |
|             | Median Filter Threshold Ratio | 0.1          |
|             | Median Filter Threshold Limit | 10           |
